# Supplementary material
Source: ML conference proceedings conference paper supplement (https://openreview.net/forum?id=Qv6468llWS)
Supplement: supplementary_material [file attachment]

369  
370  
371

---

# Supplementary material

## PDE-Refiner: Achieving Accurate Long Rollouts with Neural PDE Solvers

---

### Table of Contents

---

|     |                                                         |           |
|-----|---------------------------------------------------------|-----------|
| 372 | <b>A Broader Impact</b>                                 | <b>16</b> |
| 373 | <b>B Reproducibility Statement</b>                      | <b>16</b> |
| 374 | <b>C PDE-Refiner - Pseudocode</b>                       | <b>17</b> |
| 375 | <b>D Experimental details</b>                           | <b>19</b> |
| 376 | D.1 Kuramoto-Sivashinsky 1D dataset . . . . .           | 19        |
| 377 | D.2 Parameter-dependent KS dataset . . . . .            | 23        |
| 378 | D.3 Kolmogorov 2D Flow . . . . .                        | 24        |
| 379 | <b>E Supplementary Experimental Results</b>             | <b>27</b> |
| 380 | E.1 Fourier Neural Operator . . . . .                   | 27        |
| 381 | E.2 Step Size Comparison . . . . .                      | 28        |
| 382 | E.3 History Information . . . . .                       | 29        |
| 383 | E.4 Uncertainty Estimation . . . . .                    | 30        |
| 384 | E.5 Frequency Analysis for 2D Kolmogorov Flow . . . . . | 31        |
| 385 | E.6 Minimum noise variance in PDE-Refiner . . . . .     | 32        |
| 386 | E.7 Stability of Very Long Rollouts . . . . .           | 33        |

---

## 387 A Broader Impact

388 Neural PDE solvers hold significant potential for offering computationally cheaper approaches to  
389 modeling a wide range of natural phenomena than classical solvers. As a result, PDE surrogates  
390 could potentially contribute to advancements in various research fields, particularly within the natural  
391 sciences, such as fluid dynamics and weather modeling. Further, reducing the compute needed for  
392 simulations may reduce the carbon footprint of research institutes and industries that rely on such  
393 models. Our proposed method, PDE-Refiner, can thereby help in improving the accuracy of these  
394 neural solvers, particularly for long-horizon predictions, making their application more viable.

395 However, it is crucial to note that reliance on simulations necessitates rigorous cross-checks and  
396 continuous monitoring. This is particularly true for neural surrogates, which may have been trained  
397 on simulations themselves and could introduce additional errors when applied to data outside of its  
398 original training distribution. Hence, it is crucial for the underlying assumptions and limitations of  
399 these surrogates to be well-understood in applications.

## 400 B Reproducibility Statement

401 To ensure reproducibility, we report the used model architectures, hyperparameters, and dataset  
402 properties in detail in Section 4 and Appendix D. We additionally include pseudocode for our proposed  
403 method, PDE-Refiner, in Appendix C. All experiments on the KS datasets have been repeated for  
404 five seeds, and three seeds have been used for the Kolmogorov Flow dataset. Plots and tables with  
405 quantitative results show the standard deviation across these seeds.

406 As existing software assets, we base our implementation on the PDE-Arena [21], which implements  
407 a Python-based training framework for neural PDE solvers in PyTorch [60] and PyTorch Lightning  
408 [14]. For the diffusion models, we use the library diffusers [63]. We use Matplotlib [33] for plotting  
409 and NumPy [85] for data handling. For data generation, we use scipy [81] in the public code of  
410 Brandstetter et al. [8] for the KS equation, and JAX [6] in the public code of Kochkov et al. [42], Sun  
411 et al. [75] for the 2D Kolmogorov Flow dataset. The usage of these assets is further described in  
412 Appendix D. Since our code is proprietary, we include pseudocode in Appendix C and will release  
413 the full code alongside the datasets in this paper upon publication.

414 In terms of computational resources, all experiments have been performed on NVIDIA V100 GPUs  
415 with 16GB memory. For the experiments on the KS equation, each model was trained on a single  
416 NVIDIA V100 for 1 to 2 days. For the 2D Kolmogorov Flow dataset, we parallelized the models  
417 across 4 GPUs, with a training time of 2 days. The speed comparison for the 2D Kolmogorov Flow  
418 were performed on an NVIDIA A100 GPU with 80GB memory. Overall, the experiments in this paper  
419 required roughly 250 GPU days, with additional 400 GPU days for development, hyperparameter  
420 search, and the supplementary results in Appendix E.

## 421 C PDE-Refiner - Pseudocode

422 In this section, we provide pseudocode to implement PDE-Refiner in Python with common deep  
 423 learning frameworks like PyTorch [60] and JAX [6]. The hyperparameters to PDE-Refiner are  
 424 the number of refinement steps  $K$ , called `num_steps` in the pseudocode, and the minimum noise  
 425 standard deviation  $\sigma_{\min}$ , called `min_noise_std`. Further, the neural operator NO can be an arbitrary  
 426 network architecture, such as a U-Net as in our experiments, and is represented by `MyNetwork /`  
 427 `self.neural_operator` in the code.

428 The dynamics of PDE-Refiner can be implemented via three short functions. The `train_step`  
 429 function takes as input a training example of solution  $u(t)$  (named `u_t`) and the previous solution  
 430  $u(t - \Delta t)$  (named `u_prev`). We uniformly sample the refinement step we want to train, and use the  
 431 classical MSE objective if  $k = 0$ . Otherwise, we train the model to denoise  $u(t)$ . The loss can  
 432 be used to calculate gradients and update the parameters with common optimizers. The operation  
 433 `randn_like` samples Gaussian noise of the same shape as `u_t`. Further, for batch-wise inputs,  
 434 we sample  $k$  for each batch element independently. For inference, we implement the function  
 435 `predict_next_solution`, which iterates through the refinement process of PDE-Refiner. Lastly,  
 436 to generate a trajectory from an initial condition `u_initial`, the function `rollout` autoregressively  
 437 predicts the next solutions. This gives us the following pseudocode:

---

```

1  class PDERefiner:
2      def __init__(self, num_steps, min_noise_std):
3          self.num_steps = num_steps
4          self.min_noise_std = min_noise_std
5          self.neural_operator = MyNetwork(...)
6
7      def train_step(self, u_t, u_prev):
8          k = randint(0, self.num_steps + 1)
9          if k == 0:
10             pred = self.neural_operator(zeros_like(u_t), u_prev, k)
11             target = u_t
12         else:
13             noise_std = self.min_noise_std ** (k / self.num_steps)
14             noise = randn_like(u_t)
15             u_t_noised = u_t + noise * noise_std
16             pred = self.neural_operator(u_t_noised, u_prev, k)
17             target = noise
18             loss = mse(pred, target)
19             return loss
20
21     def predict_next_solution(self, u_prev):
22         u_hat_t = self.neural_operator(zeros_like(u_prev), u_prev, 0)
23         for k in range(1, self.num_steps + 1):
24             noise_std = self.min_noise_std ** (k / self.num_steps)
25             noise = randn_like(u_t)
26             u_hat_t_noised = u_hat_t + noise * noise_std
27             pred = self.neural_operator(u_hat_t_noised, u_prev, k)
28             u_hat_t = u_hat_t_noised - pred * noise_std
29         return u_hat_t
30
31     def rollout(self, u_initial, timesteps):
32         trajectory = [u_initial]
33         for t in range(timesteps):
34             u_hat_t = self.predict_next_solution(trajectory[-1])
35             trajectory.append(u_hat_t)
36         return trajectory

```

---

As discussed in Section 3.1, PDE-Refiner can be alternatively implemented as a diffusion model. To demonstrate this implementation, we use the Python library `diffusers` [63] (version 0.15) in the pseudocode below. We create a DDPM scheduler where we set the number of diffusion steps to the number of refinement steps and the prediction type to `v_prediction` [67]. Further, for simplicity,

we set the betas to the noise variances of PDE-Refiner. We note that in diffusion models and in diffusers, the noise variance  $\sigma_k^2$  at diffusion step  $k$  is calculated as:

$$\sigma_k^2 = 1 - \bar{\alpha}_k = 1 - \prod_{\kappa=k}^K (1 - \beta_\kappa) = 1 - \prod_{\kappa=k}^K (1 - \sigma_{\min}^{2\kappa/K})$$

438 Since we generally use few diffusion steps such that the noise variance falls quickly, i.e.  $\sigma_{\min}^{2k/K} \gg$   
 439  $\sigma_{\min}^{2(k+1)/K}$ , the product in above's equation is dominated by the last term  $1 - \sigma_{\min}^{2k/K}$ . Thus, the noise  
 440 variances in diffusion are  $\sigma_k^2 \approx \sigma_{\min}^{2k/K}$ . Further, for  $k = 0$  and  $k = K$ , the two variances are always  
 441 the same since the product is 0 or a single element, respectively. If needed, one could correct for the  
 442 product terms in the intermediate variances. However, as we show in Appendix [E.6](#), PDE-Refiner is  
 443 robust to small changes in the noise variance and no performance difference was notable. With this in  
 444 mind, PDE-Refiner can be implemented as follows:

---

```

1  from diffusers.schedulers import DDPMScheduler
2
3  class PDERefinerDiffusion:
4      def __init__(self, num_steps, min_noise_std):
5          betas = [min_noise_std ** (k / num_steps)
6                  for k in reversed(range(num_steps + 1))]
7          self.scheduler = DDPMScheduler(num_train_timesteps=num_steps,
8                                        trained_betas=betas,
9                                        prediction_type='v_prediction')
10         self.num_steps = num_steps
11         self.neural_operator = MyNetwork(...)
12
13     def train_step(self, u_t, u_prev):
14         k = randint(0, self.num_steps + 1)
15         noise_factor = self.scheduler.alphas_cumprod[k]
16         signal_factor = 1 - noise_factor
17         noise = randn_like(u_t)
18         u_t_noised = self.scheduler.add_noise(u_t, noise, k)
19         pred = self.neural_operator(u_t_noised, u_prev, k)
20         target = (noise_factor ** 0.5) * noise - (signal_factor ** 0.5) * u_t
21         loss = mse(pred, target)
22         return loss
23
24     def predict_next_solution(self, u_prev):
25         u_hat_t_noised = randn_like(u_prev)
26         for k in range(self.num_steps + 1):
27             pred = self.neural_operator(u_hat_t_noised, u_prev, k)
28             u_hat_t_noised = self.scheduler.step(pred, k, u_hat_t_noised)
29         u_hat_t = u_hat_t_noised
30         return u_hat_t
31
32     def rollout(self, u_initial, timesteps):
33         trajectory = [u_initial]
34         for t in range(timesteps):
35             u_hat_t = self.predict_next_solution(trajectory[-1])
36             trajectory.append(u_hat_t)
37         return trajectory

```

---

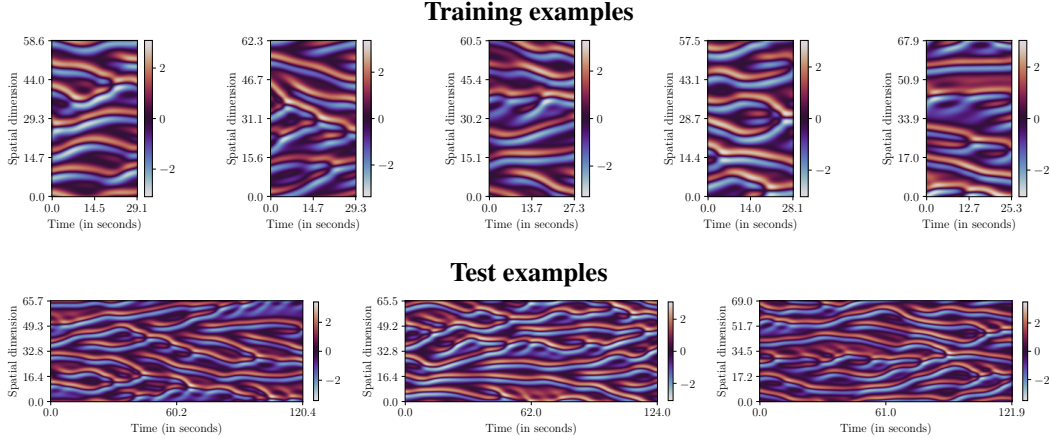

Figure 7: Dataset examples of the Kuramoto-Sivashinsky dataset. The training trajectories are generated with 140 time steps, while the test trajectories consist of 640 time steps. The spatial dimension is uniformly sampled from  $[0.9 \cdot 64, 1.1 \cdot 64]$ , and the time step in seconds from  $[0.18, 0.22]$ .

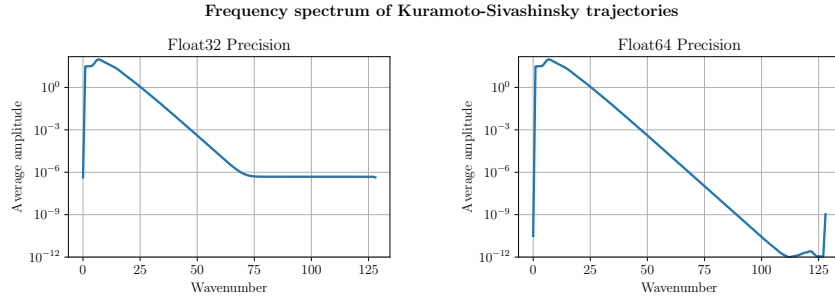

Figure 8: Frequency spectrum of the Kuramoto-Sivashinsky dataset under different precisions. Casting the input data to `float32` precision removes the high frequency information due to adding noise with higher amplitude. Neural surrogates trained on `float64` did not improve over `float32`, showing that it does not affect models in practice.

## 445 D Experimental details

446 In this section, we provide a detailed description of the data generation, model architecture, and hyper-  
 447 parameters used in our three datasets: Kuramoto-Sivashinsky (KS) equation, parameter-dependent KS  
 448 equation, and the 2D Kolmogorov flow. Additionally, we provide an overview of all results with cor-  
 449 responding error bars in numerical table form. Lastly, we show example trajectories for each dataset.

### 450 D.1 Kuramoto-Sivashinsky 1D dataset

451 **Data generation.** We follow the data generation setup of Brandstetter et al. [8], which uses the  
 452 method of lines with the spatial derivatives computed using the pseudo-spectral method. For each  
 453 trajectory in our dataset, the first 360 solution steps are truncated and considered as a warmup for the  
 454 solver. For further details on the data generation setup, we refer to Brandstetter et al. [8].

455 Our dataset can be reproduced with the public code<sup>3</sup> of Brandstetter et al. [8]. To obtain the training  
 456 data, the data generation command in the repository needs to be adjusted by setting the number of  
 457 training samples to 2048, and 0 for both validation and testing. For validation and testing, we increase  
 458 the rollout time by adding the arguments `--nt=1000 --nt_effective=640 --end_time=200`,  
 459 and setting the number of samples to 128 each. We provide training and test examples in Figure 7.

<sup>3</sup><https://github.com/brandstetter-johannes/LPSDA#produce-datasets-for-kuramoto-shivashinsky-ks-equation>

Table 2: Detailed list of layers in the deployed modern U-Net. The parameter *channels* next to a layer represents the number of feature channels of the layer’s output. The U-Net uses the four different channel sizes  $c_1, c_2, c_3, c_4$ , which are hyperparameters. The skip connection from earlier layers in a residual block is implemented by concatenating the features before the first GroupNorm. For the specifics of the residual blocks, see Figure 9.

| Index               | Layer                                                           |
|---------------------|-----------------------------------------------------------------|
| <i>Encoder</i>      |                                                                 |
| 1                   | Conv(kernel size=3, channels= $c_1$ , stride=1)                 |
| 2                   | ResidualBlock(channels= $c_1$ )                                 |
| 3                   | ResidualBlock(channels= $c_1$ )                                 |
| 4                   | Conv(kernel size=3, channels= $c_1$ , stride=2)                 |
| 5                   | ResidualBlock(channels= $c_2$ )                                 |
| 6                   | ResidualBlock(channels= $c_2$ )                                 |
| 7                   | Conv(kernel size=3, channels= $c_2$ , stride=2)                 |
| 8                   | ResidualBlock(channels= $c_3$ )                                 |
| 9                   | ResidualBlock(channels= $c_3$ )                                 |
| 10                  | Conv(kernel size=3, channels= $c_3$ , stride=2)                 |
| 11                  | ResidualBlock(channels= $c_4$ )                                 |
| 12                  | ResidualBlock(channels= $c_4$ )                                 |
| <i>Middle block</i> |                                                                 |
| 13                  | ResidualBlock(channels= $c_4$ )                                 |
| 14                  | ResidualBlock(channels= $c_4$ )                                 |
| <i>Decoder</i>      |                                                                 |
| 15                  | ResidualBlock(channels= $c_4$ , skip connection from Layer 12)  |
| 16                  | ResidualBlock(channels= $c_4$ , skip connection from Layer 11)  |
| 17                  | ResidualBlock(channels= $c_3$ , skip connection from Layer 10)  |
| 18                  | TransposeConvolution(kernel size=4, channels= $c_3$ , stride=2) |
| 19                  | ResidualBlock(channels= $c_3$ , skip connection from Layer 9)   |
| 20                  | ResidualBlock(channels= $c_3$ , skip connection from Layer 8)   |
| 21                  | ResidualBlock(channels= $c_2$ , skip connection from Layer 7)   |
| 22                  | TransposeConvolution(kernel size=4, channels= $c_3$ , stride=2) |
| 19                  | ResidualBlock(channels= $c_2$ , skip connection from Layer 6)   |
| 20                  | ResidualBlock(channels= $c_2$ , skip connection from Layer 5)   |
| 21                  | ResidualBlock(channels= $c_1$ , skip connection from Layer 4)   |
| 22                  | TransposeConvolution(kernel size=4, channels= $c_3$ , stride=2) |
| 23                  | ResidualBlock(channels= $c_1$ , skip connection from Layer 3)   |
| 24                  | ResidualBlock(channels= $c_1$ , skip connection from Layer 2)   |
| 25                  | ResidualBlock(channels= $c_1$ , skip connection from Layer 1)   |
| 26                  | GroupNorm(channels= $c_1$ , groups=8)                           |
| 27                  | GELU activation                                                 |
| 28                  | Convolution(kernel size=3, channels=1, stride=1)                |

460 The data is generated with float64 precision, and afterward converted to float32 precision for  
 461 storing and training of the neural surrogates. Since we convert the precision in spatial domain, it  
 462 causes minor artifacts in the frequency spectrum as seen in Figure 8. Specifically, frequencies with  
 463 wavenumber higher than 60 cannot be adequately represented. Quantizing the solution values in  
 464 spatial domain introduce high-frequency noise which is greater than the original amplitudes. Training  
 465 the neural surrogates with float64 precision did not show any performance improvement, besides  
 466 being significantly more computationally expensive.

467 **Model architecture.** For all models in Section 4.1, we use the modern U-Net architecture from  
 468 Gupta et al. [21], which we detail in Table 2. The U-Net consists of an encoder and decoder, which  
 469 are implemented via several pre-activation ResNet blocks [24, 25] with skip connections between  
 470 encoder and decoder blocks. The ResNet block is visualized in Figure 9 and consists of Group  
 471 Normalization [86], GELU activations [26], and convolutions with kernel size 3. The conditioning  
 472 parameters  $\Delta t$  and  $\Delta x$  are embedded into feature vector space via sinusoidal embeddings, as for

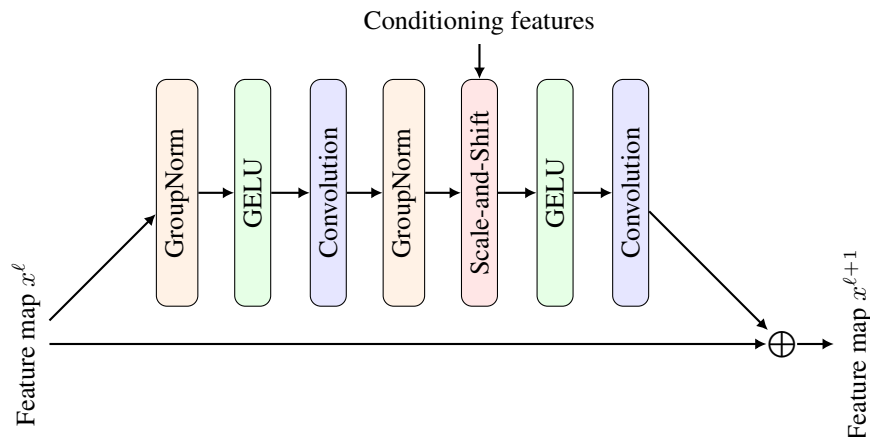

Figure 9: ResNet block of the modern U-Net [21]. Each block consists of two convolutions with GroupNorm and GELU activations. The conditioning features, which are  $\Delta t$ ,  $\Delta x$  for the KS dataset and additionally  $\nu$  for the parameter-dependent KS dataset, influence the features via a scale-and-shift layer. Residual blocks with different input and output channels use a convolution with kernel size 1 on the residual connection.

Table 3: Hyperparameter overview for the experiments on the KS equation. Hyperparameters have been optimized for the baseline MSE-trained model on the validation dataset, which generally worked well across all models.

| Hyperparameter   | Value                                        |
|------------------|----------------------------------------------|
| Input Resolution | 256                                          |
| Number of Epochs | 400                                          |
| Batch size       | 128                                          |
| Optimizer        | AdamW [50]                                   |
| Learning rate    | CosineScheduler(1e-4 $\rightarrow$ 1e-6)     |
| Weight Decay     | 1e-5                                         |
| Time step        | 0.8s / 4 $\Delta t$                          |
| Output factor    | 0.3                                          |
| Network          | Modern U-Net [21]                            |
| Hidden size      | $c_1 = 64, c_2 = 128, c_3 = 256, c_4 = 1024$ |
| Padding          | circular                                     |
| EMA Decay        | 0.995                                        |

473 example used in Transformers [80]. We combine the feature vectors via linear layers and integrate  
 474 them in the U-Net via AdaGN [59, 62] layers, which predicts a scale and shift parameter for each  
 475 channel applied after the second Group Normalization in each residual block. We represent it as a  
 476 'scale-and-shift' layer in Figure 9. We also experimented with adding attention layers in the residual  
 477 blocks, which, however, did not improve performance noticeably. The implementation of the U-Net  
 478 architecture can be found in the public code of Gupta et al. [21].<sup>4</sup>

479 **Hyperparameters.** We detail the used hyperparameters for all models in Table 3. We train the models  
 480 for 400 epochs on a batch size of 128 with an AdamW optimizer [50]. One epoch corresponds to  
 481 iterating through all training sequences and picking 100 random initial conditions each. The learning  
 482 rate is initialized with 1e-4, and follows a cosine annealing strategy to end with a final learning rate of  
 483 1e-6. We did not find learning rate warmup to be needed for our models. For regularization, we use a  
 484 weight decay of 1e-5. As mentioned in Section 4.1, we train the neural operators to predict 4 time  
 485 steps ahead via predicting the residual  $\Delta u = u(t) - u(t - 4\Delta t)$ . For better output coverage of the  
 486 neural network, we normalize the residual to a standard deviation of about 1 by dividing it with 0.3.

<sup>4</sup>[https://github.com/microsoft/pdearena/blob/main/pdearena/modules/conditioned/twod\\_unet.py](https://github.com/microsoft/pdearena/blob/main/pdearena/modules/conditioned/twod_unet.py)



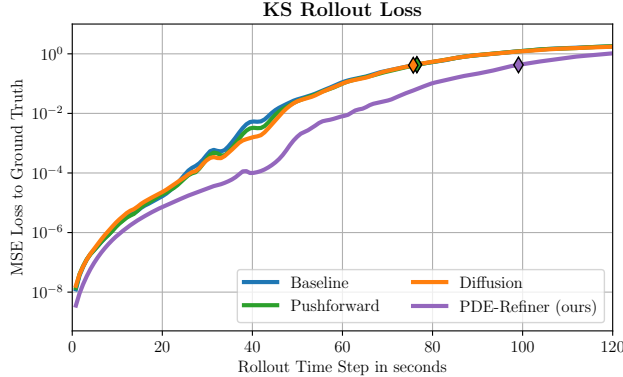

Figure 10: Visualizing the average MSE error over rollouts on the test set for four methods: the baseline MSE-trained model (blue), the pushforward trick (green), the diffusion model with standard cosine scheduling (orange), and PDE-Refiner with 8 refinement steps. The markers indicate the time when the method’s average rollout correlation falls below 0.8. The y-axis shows the logarithmic scale of the MSE error. While all models have a similar loss for the first 20 seconds, PDE-Refiner has a much smaller increase of loss afterwards.

487 Thus, the neural operators predict the next time step via  $\hat{u}(t) = u(t - 4\Delta t) + 0.3 \cdot \text{NO}(u(t - 4\Delta t))$ .  
 488 We provide an ablation study on the step size in Appendix E.2. For the modern U-Net, we set the  
 489 hidden sizes to 64, 128, 256, and 1024 on the different levels, following Gupta et al. [21]. This gives  
 490 the model a parameter count of about 55 million. Crucially, all convolutions use circular padding in  
 491 the U-Net to account for the periodic domain. Finally, we found that using an exponential moving  
 492 average (EMA) [40] of the model parameters during validation and testing, as commonly used in  
 493 diffusion models [29, 37] and generative adversarial networks [15, 87], improves performance and  
 494 stabilizes the validation performance progress over training iterations across all models. We set the  
 495 decay rate of the moving average to 0.995, although it did not appear to be a sensitive hyperparameter.

496 Next, we discuss extra hyperparameters for each method in Figure 3 individually. The history 2 model  
 497 includes earlier time steps by concatenating  $u(t - 8\Delta t)$  with  $u(t - 4\Delta t)$  over the channel dimension.  
 498 We implement the model with  $4\times$  parameters by multiplying the hidden size by 2, i.e. use 128, 256,  
 499 512, and 2048. This increases the weight matrices by a factor of 4. For the pushforward trick, we  
 500 follow the public implementation of Brandstetter et al. [9] and increase the probability of replacing  
 501 the ground truth with a prediction over the first 10 epochs. Additionally, we found it beneficial to  
 502 use the EMA model weights for creating the predictions, and rolled out the model up to 3 steps. We  
 503 implemented the Markov Neural Operator following the public code<sup>9</sup> of Li et al. [49]. We performed  
 504 a hyperparameter search over  $\lambda \in \{0.2, 0.5, 0.8\}$ ,  $\alpha \in \{0.001, 0.01, 0.1\}$ ,  $k \in \{0, 1\}$ , for which we  
 505 found  $\lambda = 0.5$ ,  $\alpha = 0.01$ ,  $k = 0$  to work best. The error correction during rollout is implemented  
 506 by performing an FFT on each prediction, setting the amplitude and phase for wavenumber 0 and  
 507 above 60 to zero, and mapping back to spatial domain via an inverse FFT. For the error prediction, in  
 508 which one neural operator tries to predict the error of the second operator, we scale the error back to  
 509 an average standard deviation of 1 to allow for a better output scale of the second U-Net. The DDPM  
 510 Diffusion model is implemented using the diffusers library [63]. We use a DDPM scheduler with  
 511 squaredcos\_cap\_v2 scheduling, a beta range of 1e-4 to 1e-1, and 1000 train time steps. During  
 512 inference, we set the number of sampling steps to 16 (equally spaced between 0 and 1000) which we  
 513 found to obtain best results while being more efficient than 1000 steps. For our schedule, we set the  
 514 betas the same way as shown in the pseudocode of Appendix C. Lastly, we implement PDE-Refiner  
 515 using the diffusers library [63] as shown in Appendix C. We choose the minimum noise variance  
 516  $\sigma_{\min}^2 = 2e-7$  based on a hyperparameter search on the validation, and provide an ablation study on it  
 517 in Appendix E.6

518 **Results.** We provide an overview of the results in Figure 3 as table in Table 4. Besides the high-  
 519 correction time with thresholds 0.8 and 0.9, we also report the one-step MSE error between the

<sup>9</sup><https://github.com/brandstetter-johannes/MP-Neural-PDE-Solvers/>  
<sup>9</sup>[https://github.com/neuraloperator/markov\\_neural\\_operator/](https://github.com/neuraloperator/markov_neural_operator/)



Table 4: Results of Figure 3 in table form. All standard deviations are reported over 5 seeds excluding *Ensemble*, which used all 5 baseline model seeds and has thus no standard deviation. Further, we include the average one-step MSE error of each method on the test set. Notably, lower one-step MSE does not necessarily imply longer stable rollouts (e.g. History 2 versus baseline).

| Method                              | Corr. > 0.8 time | Corr. > 0.9 time | One-step MSE        |
|-------------------------------------|------------------|------------------|---------------------|
| <i>MSE Training</i>                 |                  |                  |                     |
| Baseline                            | 75.4 ± 1.1       | 66.5 ± 0.8       | 2.70e-08 ± 8.52e-09 |
| History 2                           | 61.7 ± 1.1       | 54.3 ± 1.8       | 1.50e-08 ± 1.67e-09 |
| 4× parameters                       | 79.7 ± 0.7       | 71.7 ± 0.7       | 1.02e-08 ± 4.91e-10 |
| Ensemble                            | 79.7 ± 0.0       | 72.5 ± 0.0       | 5.56e-09 ± 0.00e+00 |
| <i>Alternative Losses</i>           |                  |                  |                     |
| Pushforward [9]                     | 75.4 ± 1.1       | 67.3 ± 1.7       | 2.76e-08 ± 5.68e-09 |
| Sobolev norm $k = 0$ [49]           | 71.4 ± 2.9       | 62.2 ± 3.9       | 1.33e-07 ± 8.70e-08 |
| Sobolev norm $k = 1$ [49]           | 66.9 ± 1.8       | 59.3 ± 1.5       | 1.04e-07 ± 3.28e-08 |
| Sobolev norm $k = 2$ [49]           | 8.7 ± 0.9        | 7.3 ± 0.5        | 7.84e-04 ± 9.30e-05 |
| Markov Neural Operator [49]         | 66.6 ± 1.0       | 58.5 ± 2.1       | 2.66e-07 ± 1.08e-07 |
| Error correction [56]               | 74.8 ± 1.1       | 66.2 ± 0.9       | 1.46e-08 ± 1.99e-09 |
| Error Prediction                    | 75.7 ± 0.5       | 67.3 ± 0.6       | 2.96e-08 ± 2.36e-10 |
| <i>Diffusion Ablations</i>          |                  |                  |                     |
| Diffusion - Standard Scheduler [29] | 75.2 ± 1.0       | 66.9 ± 0.7       | 3.06e-08 ± 5.24e-10 |
| Diffusion - Our Scheduler           | 88.9 ± 1.0       | 79.7 ± 1.1       | 2.85e-09 ± 1.65e-10 |
| <i>PDE-Refiner</i>                  |                  |                  |                     |
| PDE-Refiner - 1 step (ours)         | 89.8 ± 0.4       | 80.6 ± 0.2       | 3.14e-09 ± 2.85e-10 |
| PDE-Refiner - 2 steps (ours)        | 94.2 ± 0.8       | 84.2 ± 0.4       | 5.24e-09 ± 1.54e-10 |
| PDE-Refiner - 3 steps (ours)        | 97.5 ± 0.5       | 87.0 ± 0.9       | 5.80e-09 ± 1.65e-09 |
| PDE-Refiner - 4 steps (ours)        | 98.3 ± 0.8       | 87.8 ± 1.6       | 5.95e-09 ± 1.95e-09 |
| PDE-Refiner - 8 steps (ours)        | 98.3 ± 0.1       | 89.0 ± 0.4       | 6.16e-09 ± 1.48e-09 |
| PDE-Refiner - 3 steps mean (ours)   | 98.5 ± 0.8       | 88.6 ± 1.1       | 1.28e-09 ± 6.27e-11 |

520 prediction  $\hat{u}(t)$  and the ground truth solution  $u(t)$ . A general observation is that the one-step MSE  
521 is not a strong indication of the rollout performance. For example, the MSE loss of the history 2  
522 model is twice as low as the baseline’s loss, but performs significantly worse in rollout. Similarly,  
523 the Ensemble has a lower one-step error than PDE-Refiner with more than 3 refinement steps, but is  
524 almost 20 seconds behind in rollout.

525 As an additional metric, we visualize in Figure 10 the mean-squared error loss between predictions  
526 and ground truth during rollout. In other words, we replace the correlation we usually measure during  
527 rollout with the MSE. While PDE-Refiner starts out with similar losses as the baselines for the first 20  
528 seconds, it has a significantly smaller increase in loss afterward. This matches our frequency analysis,  
529 where only in later time steps, the non-dominant, high frequencies start to impact the main dynamics.  
530 Since PDE-Refiner can model these frequencies in contrast to the baselines, it maintains a smaller  
531 error accumulation.

532 **Speed comparison.** We provide a speed comparison of an MSE-trained baseline with PDE-Refiner  
533 on the KS equation. We time the models on generating the test trajectories (batch size 128, rollout  
534 length  $640\Delta t$ ) on an NVIDIA A100 GPU with a 24 core AMD EPYC CPU. We compile the models  
535 in PyTorch 2.0 [60], and exclude compilation and data loading time from the runtime. The MSE  
536 model requires 2.04 seconds ( $\pm 0.01$ ), while PDE-Refiner with 3 refinement steps takes 8.67 seconds  
537 ( $\pm 0.01$ ). In contrast, the classical solver used for data generation requires on average 47.21 seconds  
538 per trajectory, showing the significant speed-up of the neural surrogates. However, it should be noted  
539 that the solver is implemented on CPU and there may exist faster solvers for the 1D Kuramoto-  
540 Sivashinsky equation.

## 541 D.2 Parameter-dependent KS dataset

542 **Data generation.** We follow the same data generation as in Appendix D.1 To integrate the viscosity  
543  $\nu$ , we multiply the fourth derivative estimate  $u_{xxxx}$  by  $\nu$ . For each training and test trajectory, we  
544 uniformly sample  $\nu$  between 0.5 and 1.5. We show the effect of different viscosity terms in Figure 11

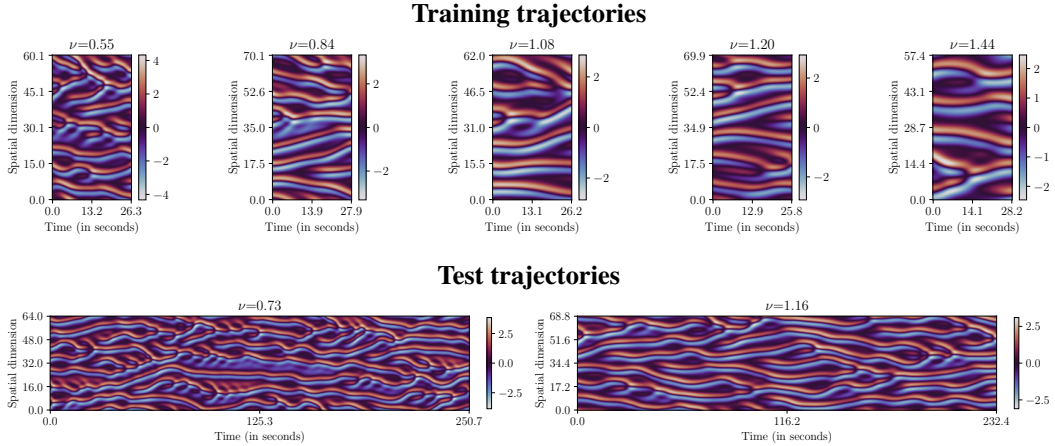

Figure 11: Dataset examples of the parameter-dependent Kuramoto-Sivashinsky dataset. The viscosity is noted above each trajectory. The training trajectories are 140 time steps, while the test trajectories are rolled out for 1140 time steps. Lower viscosities generally create more complex, difficult trajectories.

Table 5: Results of Figure 6 in table form. All standard deviations are reported over 5 seeds.

| Method       | Viscosity  | Corr. > 0.8 time | Corr. > 0.9 time |
|--------------|------------|------------------|------------------|
| MSE Training | [0.5, 0.7) | 41.8 ± 0.4       | 35.6 ± 0.6       |
|              | [0.7, 0.9) | 57.7 ± 0.6       | 50.7 ± 1.3       |
|              | [0.9, 1.1) | 73.3 ± 2.3       | 66.0 ± 2.5       |
|              | [1.1, 1.3) | 88.0 ± 1.5       | 76.7 ± 2.2       |
|              | [1.3, 1.5] | 97.0 ± 2.7       | 85.5 ± 2.2       |
| PDE-Refiner  | [0.5, 0.7) | 53.1 ± 0.4       | 46.7 ± 0.4       |
|              | [0.7, 0.9) | 71.4 ± 0.3       | 64.3 ± 0.6       |
|              | [0.9, 1.1) | 94.5 ± 0.6       | 84.9 ± 0.6       |
|              | [1.1, 1.3) | 112.2 ± 0.9      | 98.5 ± 1.5       |
|              | [1.3, 1.5] | 130.2 ± 1.5      | 116.6 ± 0.7      |

545 **Model architecture.** We use the same modern U-Net as in Appendix D.1. The conditioning features  
 546 consist of  $\Delta t$ ,  $\Delta x$ , and  $\nu$ . For better representation in the sinusoidal embedding, we scale  $\nu$  to the  
 547 range  $[0, 100]$  before embedding it.

548 **Hyperparameters.** We reuse the same hyperparameters of Appendix D.1 except reducing the  
 549 number of epochs to 250. This is since the training dataset is twice as large as the original KS dataset,  
 550 and the models converge after fewer epochs.

551 **Results.** We provide the results of Figure 6 in table form in Table 5. Overall, PDE-Refiner  
 552 outperforms the MSE-trained baseline by 25-35% across viscosities.

### 553 D.3 Kolmogorov 2D Flow

554 **Data generation.** We followed the data generation of Sun et al. [75] as detailed in the publicly  
 555 released code [7]. For hyperparameter tuning, we additionally generate a validation set of the same size  
 556 as the test data with initial seed 123. Afterward, we remove trajectories where the ground truth solver  
 557 had NaN outputs, and split the trajectories into sub-sequences of 50 frames for efficient training. An  
 558 epoch consists of iterating over all sub-sequences and sampling 5 random initial conditions from  
 559 each. All data are stored in float32 precision.

560 **Model architecture.** We again use the modern U-Net [21] for PDE-Refiner and an MSE-trained

[https://github.com/Edward-Sun/TSM-PDE/blob/main/data\\_generation.md](https://github.com/Edward-Sun/TSM-PDE/blob/main/data_generation.md)

Table 6: Hyperparameter overview for the experiments on the Kolmogorov 2D flow.

| Hyperparameter   | Value                                      |
|------------------|--------------------------------------------|
| Input Resolution | $64 \times 64$                             |
| Number of Epochs | 100                                        |
| Batch size       | 32                                         |
| Optimizer        | AdamW [50]                                 |
| Learning rate    | CosineScheduler( $1e-4 \rightarrow 1e-6$ ) |
| Weight Decay     | $1e-5$                                     |
| Time step        | $0.112s / 16\Delta t$                      |
| Output factor    | 0.16                                       |
| Network          | Modern U-Net [21]                          |
| Hidden size      | [128, 128, 256, 1024]                      |
| Padding          | circular                                   |
| EMA Decay        | 0.995                                      |

561 baseline, where, in comparison to the model for the KS equation, we replace 1D convolutions with  
 562 2D convolutions. Due to the low input resolution, we experienced that the model lacked complexity  
 563 on the highest feature resolution. Thus, we increased the initial hidden size to 128, and use 4 ResNet  
 564 blocks instead of 2 on this level. All other levels remain the same as for the KS equation. This model  
 565 has 157 million parameters.

566 The Fourier Neural Operator [48] consists of 8 layers, where each layer consists of a spectral  
 567 convolution with a skip connection of a  $1 \times 1$  convolution and GELU activation [26]. We performed  
 568 a hyperparameter search over the number of modes and hidden size, for which we found 32 modes  
 569 with hidden size 64 to perform best. This models has 134 million parameters, roughly matching the  
 570 parameter count of a U-Net. Models with larger parameter count, e.g. hidden size 128 with 32 modes,  
 571 did not show any improvements.

572 **Hyperparameters.** We summarize the chosen hyperparameters in Table 6, which were selected  
 573 based on the performance on the validation dataset. We train the models for 100 epochs with a batch  
 574 size of 32. Due to the increased memory usage, we parallelize the model over 4 GPUs with batch  
 575 size 8 each. We predict every 16th time step, which showed similar performance to models with a  
 576 time step of 1, 2, 4, and 8 while being faster to roll out. All models use as objective the residual  
 577  $\Delta u = u(t) - u(t - 16\Delta t)$ , which we normalize by dividing with its training standard deviation of  
 578 0.16. Thus, we predict the next solution via  $\hat{u}(t) = u(t - 16\Delta t) + 0.16 \cdot \text{NO}(\dots)$ . Each model is  
 579 trained for 3 seeds, and the standard deviation is reported in Table 1.

580 **Results.** We include example trajectories and corresponding predictions by PDE-Refiner in Figure 12.  
 581 PDE-Refiner is able to maintain accurate predictions for more than 11 seconds for many trajectories.

582 **Speed comparison.** All models are run on the same hardware, namely an NVIDIA A100 GPU  
 583 with 80GB memory and an 24 core AMD EPYC CPU. For the hybrid solvers, we use the public  
 584 implementation in JAX [6] by Kochkov et al. [42], Sun et al. [75]. For the U-Nets, we use PyTorch  
 585 2.0 [14]. All models are compiled in their respective frameworks, and we exclude the compilation  
 586 and time to load the data from the runtime. We measure the speed of each model 5 times, and report  
 587 the mean and standard deviation in Section 4.3.

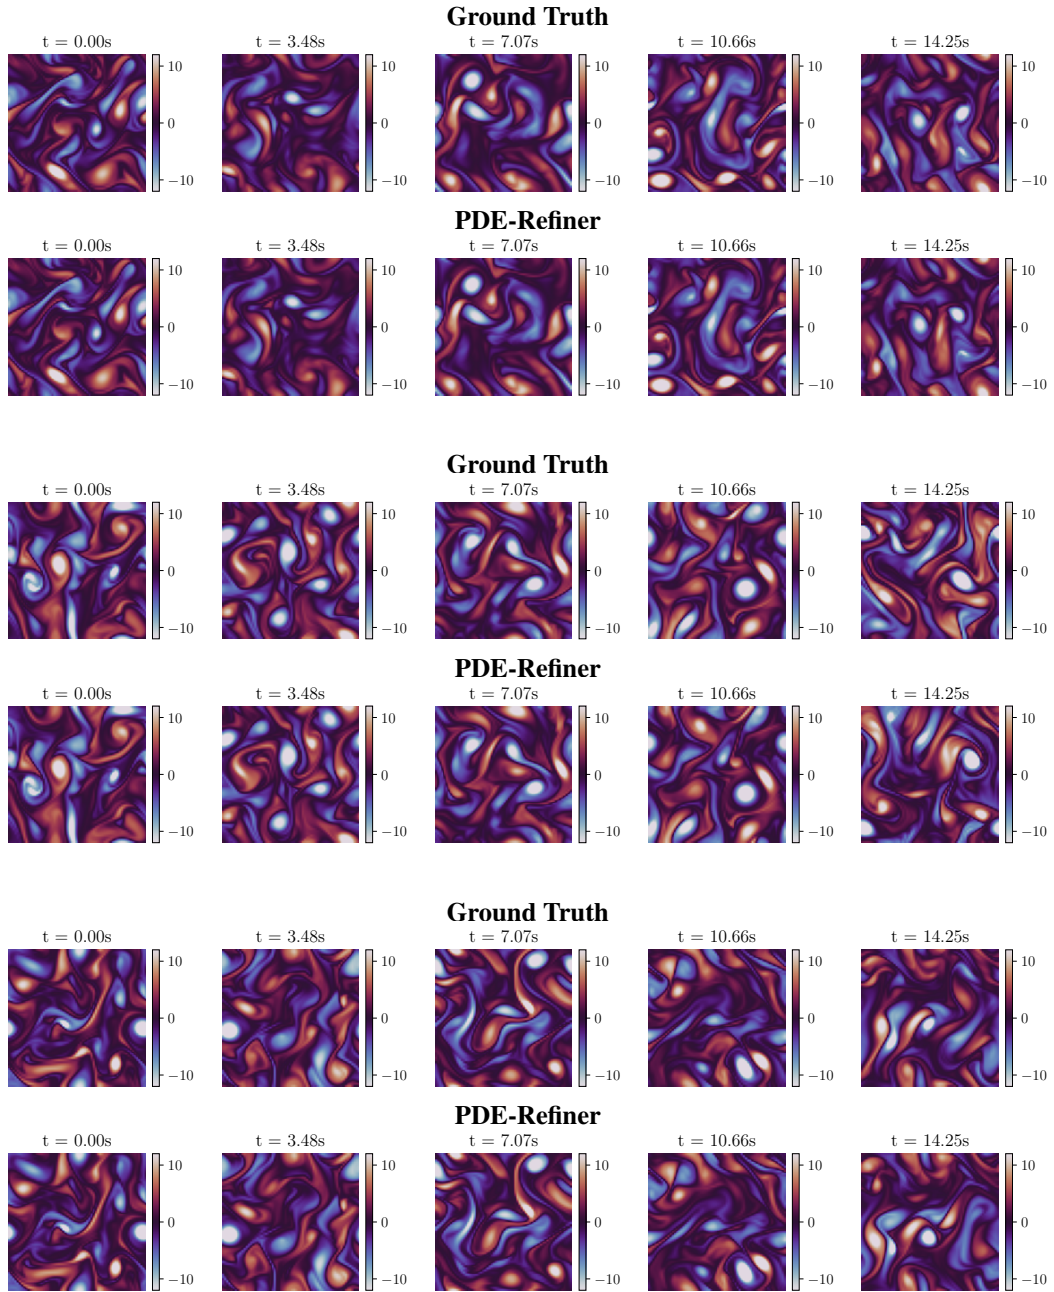

Figure 12: Visualizing the vorticity of three example test trajectories of the 2D Kolmogorov flow, with corresponding predictions of PDE-Refiner. PDE-Refiner remains stable for more than 10 seconds, making on minor errors at 10.66 seconds. Moreover, many structures at 14 seconds are still similar to the ground truth.

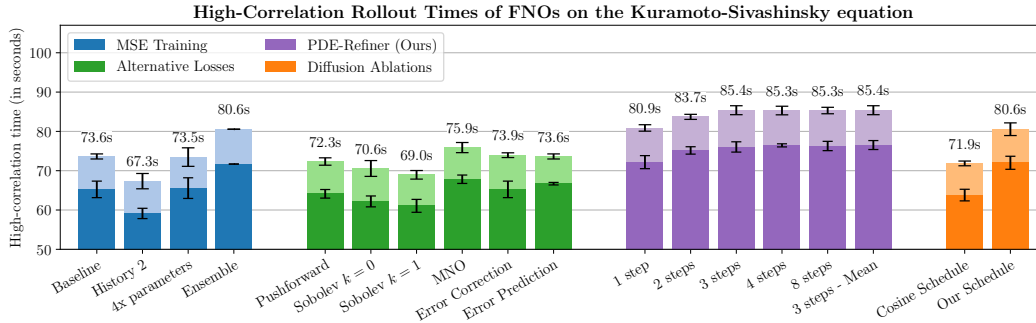

Figure 13: Experimental results of Fourier Neural Operators on the Kuramoto-Sivashinsky equation. All methods from Figure 3 are included here. FNOs achieve similar results as the U-Nets for the baselines. For PDE-Refiner and Diffusion, FNOs still outperforms the baselines, but with a smaller gain than the U-Nets due to the noise objective.

## 589 E Supplementary Experimental Results

590 In this section, we provide additional experimental results on the Kuramoto-Sivashinsky equation and  
 591 the 2D Kolmogorov flow. Specifically, we experiment with Fourier Neural Operators as an alternative  
 592 to our deployed U-Nets. We provide ablation studies on the predicted step size, the history information,  
 593 and the minimum noise variance in PDE-Refiner on the KS equation. For the Kolmogorov flow, we  
 594 provide the same frequency analysis as done for the KS equation in the main paper. Finally, we  
 595 investigate the stability of the neural surrogates for very long rollouts of 800 seconds.

### 596 E.1 Fourier Neural Operator

597 Fourier Neural Operators (FNOs) [48] are a popular alternative to U-Nets for neural operator architec-  
 598 tures. To show that the general trend of our results in Section 4.1 are architecture-invariant, we repeat  
 599 all experiments of Figure 3 with FNOs. The FNO consists of 8 layers, where each layer consists of  
 600 a spectral convolution with a skip connection of a  $1 \times 1$  convolution and a GELU activation [26].  
 601 Each spectral convolution uses the first 32 modes, and we provide closer discussion on the impact of  
 602 modes in Figure 14. We use a hidden size of 256, which leads to the model having about 40 million  
 603 parameters, roughly matching the parameter count of the used U-Nets.

604 **MSE Training.** We show the results for all methods in Figure 13. The MSE-trained FNO baseline  
 605 achieves with 73.6s a similar rollout time as the U-Net (75.4s). Again, using more history information  
 606 decreases rollout performance. Giving the model more complexity by increasing the parameter count  
 607 to 160 million did not show any improvement. Still, the ensemble of 5 MSE-trained models obtains a  
 608 7-second gain over the individual models, slightly outperforming the U-Nets for this case.

609 **Alternative losses.** The pushforward trick, the error correction and the error predictions again cannot  
 610 improve over the baseline. While using the Sobolev norm losses decrease performance also for FNOs,  
 611 using the regularizers of the Markov Neural Operator is able to provide small gains. This is in line  
 612 with the experiments of Li et al. [49], in which the MNO was originally proposed for Fourier Neural  
 613 Operators. Still, the gain is limited to 3%.

614 **PDE-Refiner.** With FNOs, PDE-Refiner again outperforms all baselines when using more than 1  
 615 refinement step. The gains again flatten for more than 3 steps. However, in comparisons to the U-Nets  
 616 with up to 98.5s accurate rollout time, the performance increase is significantly smaller. In general,  
 617 we find that FNOs obtain higher training losses for smaller noise values than U-Nets, indicating the  
 618 modeling of high-frequency noise in PDE-Refiner’s refinement objective to be the main issue. U-Nets  
 619 are more flexible in that regard, since they use spatial convolutions. Still, the results show that PDE-  
 620 Refiner is applicable to a multitude of neural operator architectures.

621 **Diffusion ablations.** Confirming the issue of the noise objective for FNOs, the diffusion models  
 622 with standard cosine scheduling obtain slightly worse results than the baseline. Using our exponential  
 623 noise scheduler again improves performance to the level of the one-step PDE-Refiner.



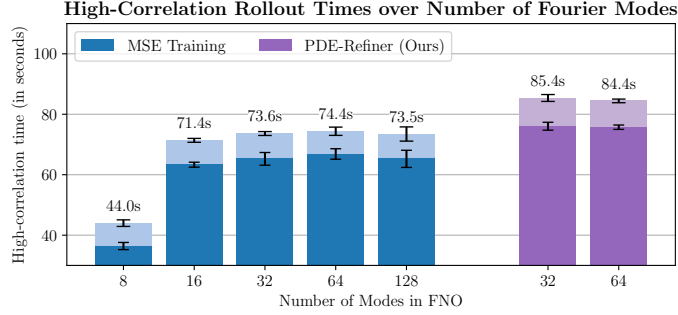

Figure 14: Investigating the impact of the choosing the number of modes in FNOs. Similar to our analysis on the resolution in the U-Nets (Figure 5), we only see minor improvements of using higher frequencies above 16 in the MSE training. Removing dominant frequencies above 8 significantly decreases performance. Similarly, increasing the modes of FNOs in PDE-Refiner has minor impact.

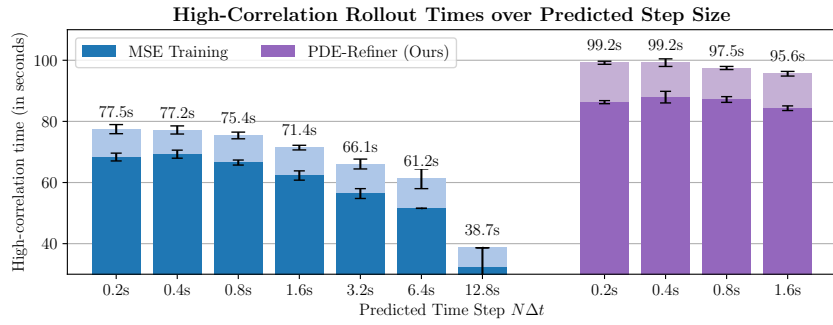

Figure 15: Comparing the accurate rollout times over the step size at which the neural operator predicts. This is a multiple of the time step  $\Delta t$  used for data generation (for KS on average 0.2s). For both the MSE Training and PDE-Refiner, lower step size provides longer stable rollouts, where very large time steps show a significant loss in accuracy. This motivates the need for autoregressive neural PDE solvers over direct, long-horizon predictions.

624 **Number of Fourier Modes.** A hyperparameter in Fourier Neural Operators is the number of Fourier  
625 modes that are considered in the spectral convolutions. Any higher frequency is ignored and must  
626 be modeled via the residual  $1 \times 1$  convolutions. To investigate the impact of the number of Fourier  
627 modes, we repeat the baseline experiments of MSE-trained FNOs with 8, 16, 32, 64, and 128 modes  
628 in Figure 14. To ensure a fair comparison, we adjust the hidden size to maintain equal number of  
629 parameters across models. In general, we find that the high-correlation time is relatively stable for 32  
630 to 128 modes. Using 16 modes slightly decreases performance, while limiting the layers to 8 modes  
631 results in significantly worse rollouts. This is also in line with our input resolution analysis of Figure 5,  
632 where the MSE-trained baseline does not improve for high resolutions. Similarly, we also apply a 64  
633 mode FNOs for PDE-Refiner. Again, the performance does not increase for higher number of modes.

## 634 E.2 Step Size Comparison

635 A key advantage of Neural PDE solvers is their flexibility to be applied to various step sizes of the  
636 PDEs. The larger the step size is, the faster the solver will be. At the same time, larger step sizes  
637 may be harder to predict. To compare the effect of error propagation in an autoregressive solver with  
638 training a model to predict large time steps, we repeat the baseline experiments of the U-Net neural  
639 operator on the KS equation with different step sizes. The default step size that was used in Figure 5  
640 is 4-times the original solver step, being on average 0.8s. For any step size below 2s, we model the  
641 residual objective  $\Delta u = u(t) - u(t - \Delta t)$ , which we found to generally work better in this range.  
642 For any step size above, we directly predict the solution  $u(t)$ .

643 **High-correlation time.** We plot the results step sizes between 0.2s and 12.8s in Figure 15. We find  
644 that the smaller the step size, the longer the model remains accurate. The performance also decreases

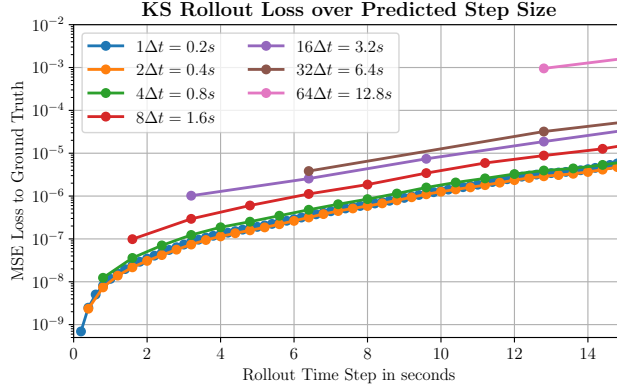

Figure 16: Visualizing the MSE error of MSE-trained models with varying step sizes over the rollout. The models with a step size of  $1\Delta t$ ,  $2\Delta t$ , and  $4\Delta t$  all obtain similar performance. For  $8\Delta t$ , the one-step MSE loss is already considerably higher than, e.g. rolling out the step size  $1\Delta t$  model 8 times. For larger time steps, this gap increases further, again highlighting the strengths of autoregressive solvers.

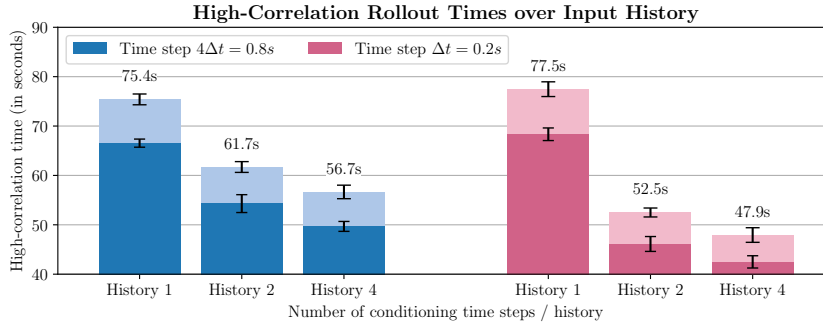

Figure 17: Investigating the impact of using more history / past time steps in the neural operators, i.e.,  $\hat{u}(t) = \text{NO}(u(t - \Delta t), u(t - 2\Delta t), \dots)$ , for  $\Delta t = 0.8$  and  $\Delta t = 0.2$ . Longer histories decrease the model’s accurate rollout time. This drop in performance is even more significant for smaller time steps.

645 faster for very large time steps. This is because the models start to overfit on the training data and have  
 646 difficulties learning the actual dynamics of the PDE. Meanwhile, very small time steps do not suffer  
 647 from autoregressive error propagation any more than slightly larger time steps, while generalizing  
 648 well. This highlights again the strength of autoregressive neural PDE solvers. We confirm this trend  
 649 by training PDE-Refiner with different step sizes while using 3 refinement steps. We again find that  
 650 smaller time steps achieve higher performance, and we obtain worse rollout times for larger time steps.

651 **MSE loss over rollout.** To further gain insights of the impact of different step sizes, we plot in  
 652 Figure [16] the MSE loss to the ground truth when rolling out the MSE-trained models over time.  
 653 Models with larger time steps require fewer autoregressive steps to predict long-term into the future,  
 654 preventing any autoregressive error accumulation for the first step. Intuitively, the error increases over  
 655 time for all models, since the errors accumulate over time and cause the model to diverge. The models  
 656 with step sizes 0.2s, 0.4s and 0.8s all achieve very similar losses across the whole time horizon. This  
 657 motivates our choice for 0.8s as default time step, since it provides a 4 times speedup in comparison  
 658 to the 0.2s model. Meanwhile, already a model trained with step size 1.6s performs considerable  
 659 worse in its one-step prediction than a model with step size 0.2s rolled out 8 times. The gap increases  
 660 further the larger the time step becomes. Therefore, directly predicting large time steps in neural PDE  
 661 solvers is not practical and autoregressive solvers provide significant advantages.

### 662 E.3 History Information

663 In our experiments on the KS equation, we have observed that using more history information as input  
 664 decreases the rollout performance. Specifically, we have used a neural operator that took as input the



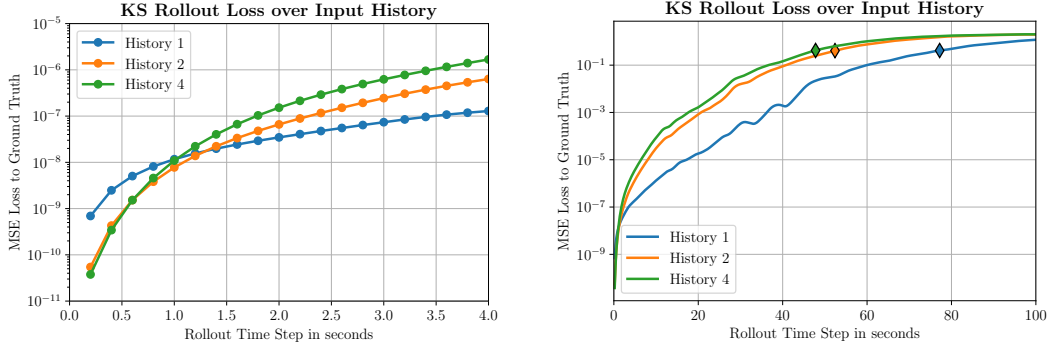

Figure 18: Comparing models conditioned on different number of past time steps on their MSE loss over rollouts. Note the log-scale on the y-axis. The markers indicate the time when the average correlation of the respective model drops below 0.8. The left plot shows a zoomed-in version of the first 4 seconds of the whole 100 second rollout on the right. While using more history information gives an advantage for the first  $\sim 5$  steps, the error propagates significantly faster through the models. This leads to a significantly higher loss over rollout.

Table 7: Comparing the uncertainty estimate of PDE-Refiner to Input Modulation [5, 68] and Model Ensemble [44, 68] on the MSE-trained models. The metrics show the correlation between the estimated and actual accurate rollout time in terms of the  $R^2$  coefficient of determination and the Pearson correlation. PDE-Refiner provides more accurate uncertainty estimates than Input Modulation while being more efficient than an Model Ensemble.

| Method                   | $R^2$ coefficient | Pearson correlation |
|--------------------------|-------------------|---------------------|
| PDE-Refiner              | $0.857 \pm 0.027$ | $0.934 \pm 0.014$   |
| Input Modulation [5, 68] | $0.820 \pm 0.081$ | $0.912 \pm 0.021$   |
| Model Ensemble [44, 68]  | $0.887 \pm 0.012$ | $0.965 \pm 0.007$   |

665 past two time steps,  $u(t - \Delta t)$  and  $u(t - 2\Delta t)$ . To confirm this trend, we repeat the experiments with a  
 666 longer history of 4 past time steps and for models with a smaller step size of 0.2s in Figure 17. Again,  
 667 we find that the more history information we use as input, the worse the rollouts become. Furthermore,  
 668 the impact becomes larger for small time steps, indicating that the autoregressive error propagation  
 669 becomes a larger issue when using history information. The problem arising is that the difference  
 670 between the inputs  $u(t - \Delta t) - u(t - 2\Delta t)$  is highly correlated with the model’s target  $\Delta u(t)$ , the  
 671 residual of the next time step. The smaller the time step, the larger the correlation. This leads the  
 672 neural operator to focus on modeling the second-order difference  $\Delta u(t) - \Delta u(t - 2\Delta t)$ . As observed  
 673 in classical solvers [35], using higher-order differences within an explicit autoregressive scheme is  
 674 known to deteriorate the rollout stability and introduce exponentially increasing errors over time.

675 We also confirm this exponential increase of error by plotting the MSE error over rollouts in Figure 18.  
 676 While the history information improves the one-step prediction by a factor of 10, the error of the  
 677 history 2 and 4 models quickly surpasses the error of the history 1 model. After that, the error of the  
 678 models continue to increase quickly, leading to an earlier divergence.

#### 679 E.4 Uncertainty Estimation

680 We extend our discussion on the uncertainty estimation of Section 4.1 by comparing PDE-Refiner to  
 681 two common baselines for uncertainty estimation of temporal forecasting: Input Modulation [5, 68]  
 682 and Model Ensemble [44, 68]. Input Modulation adds small random Gaussian noise to the initial  
 683 condition  $u(0)$ , and rolls out the model on several samples. Similar to PDE-Refiner, one can determine  
 684 the uncertainty by measuring the cross-correlation between the rollouts. A Model Ensemble compares  
 685 the predicted trajectories of several independently trained models. For the case here, we use 4 trained  
 686 models. For both baselines, we estimate the uncertainty of MSE-trained models as usually applied.

687 We evaluate the  $R^2$  coefficient of determination and the Pearson correlation between the estimated

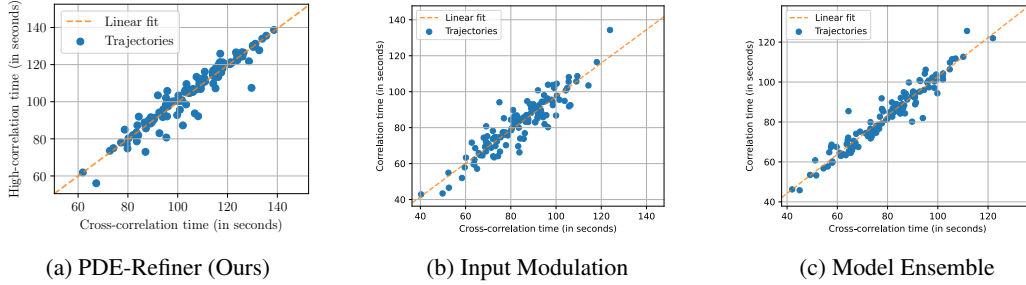

Figure 19: Qualitative comparison between the uncertainty estimates of PDE-Refiner, Input Modulation, and the Model Ensemble. Both PDE-Refiner and the Model Ensemble achieve an accurate match between the estimated and ground truth rollout times.

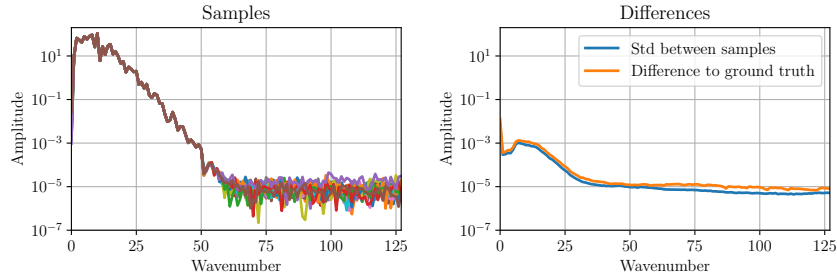

Figure 20: Investigating the spread of samples of PDE-Refiner. The left plot shows the frequency spectrum of 16 samples (each line represents a different sample), with the right plot showing the average difference to the ground truth and to the mean of the samples. The deviation of the samples closely matches the average error, showing that PDE-Refiner adapts its samples to the learned error over frequencies.

688 stable rollout times and the ground truth rollout times in Table 7. We additionally show qualitative  
 689 results in Figure 19. PDE-Refiner’s uncertainty estimate outperforms the Input Modulation approach,  
 690 showing that Gaussian noise does not fully capture the uncertainty distribution. While performing  
 691 slightly worse than using a full Model Ensemble, PDE-Refiner has the major advantage that it only  
 692 needs to be trained, which is particularly relevant in large-scale experiments like weather modeling  
 693 where training a model can be very costly.

694 To investigate the improvement of PDE-Refiner over Input Modulation, we plot the standard deviation  
 695 over samples in PDE-Refiner in Figure 20. The samples of PDE-Refiner closely differs in the same  
 696 distribution as the actual loss to the ground truth, showing that PDE-Refiner accurately models its  
 697 predictive uncertainty.

## 698 E.5 Frequency Analysis for 2D Kolmogorov Flow

699 We repeat the frequency analysis that we have performed on the KS equation in the main paper, e.g.  
 700 Figure 4, on the Kolmogorov dataset here. Note that we apply a 2D Discrete Fourier Transform and  
 701 show the average frequency spectrum. We perform this over the two channels of  $u(t)$  independently.  
 702 Figure 21 shows the frequency spectrum for the ground truth data, as well as the predictions of PDE-  
 703 Refiner and the MSE-trained U-Net. In contrast to the KS equation, the spectrum is much flatter,  
 704 having an amplitude of still almost 1 at wavenumber 32. In comparison, the KS equation has a more  
 705 than 10 times as small amplitude for this wavenumber. Further, since the resolution is only  $64 \times 64$ ,  
 706 higher modes cannot be modeled, which, as seen on the KS equation, would increase the benefit of  
 707 PDE-Refiner. This leads to both PDE-Refiner and the MSE-trained baseline to model all frequencies  
 708 accurately. The slightly higher loss for higher frequencies on channel 0 is likely due to missing high-  
 709 frequency information, i.e., larger resolution, that would be needed to estimate the frequencies more  
 710 accurately. Still, we find that PDE-Refiner improves upon the MSE-trained model on all frequencies.

711 In Figure 22 we additionally plot the predictions of PDE-Refiner at different refinement steps. Similar

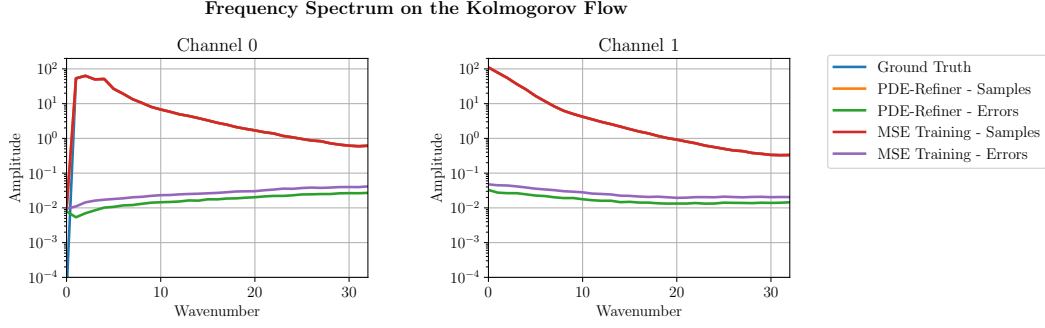

Figure 21: Frequency spectrum on the Kolmogorov Flow. The two plots show the two channels of the Kolmogorov flow. Since the data has a much more uniform support over frequencies than the KS equation, both the MSE-trained model and PDE-Refiner model the ground truth very accurately. Thus, the Ground Truth (blue), PDE-Refiner’s prediction (orange) and the MSE-trained prediction (red) overlap in both plots. Plotting the error reveals that PDE-Refiner provides small gains across all frequencies.

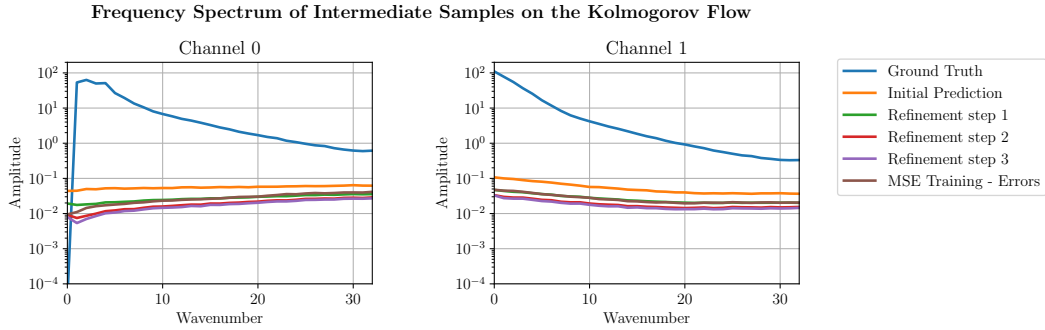

Figure 22: Frequency spectrum of intermediate samples in the refinement process of PDE-Refiner, similar to Figure 4 for the KS equation. The refinement process improves the prediction of the model step-by-step. For the last refinement step, we actually see minor improvements for the lowest frequencies of channel 0. However, due to flatter frequency spectrum, the high frequencies do not improve as much as on the KS equation.

712 to the KS equation, PDE-Refiner improves its prediction step by step. However, it is apparent that no  
 713 clear bias towards the high frequencies occur in the last time step, since the error is rather uniform  
 714 across all frequencies. Finally, the last refinement step only provides minor gains, indicating that  
 715 PDE-Refiner with 2 refinement steps would have likely been sufficient.

## 716 E.6 Minimum noise variance in PDE-Refiner

717 Besides the number of refinement step, PDE-Refiner has as a second hyperparameter the minimum  
 718 noise variance  $\sigma_{\min}^2$ , i.e., the variance of the added noise in the last refinement step. The noise variance  
 719 determines the different amplitude levels at which PDE-Refiner improves the prediction. To show  
 720 how sensitive PDE-Refiner is to different values of  $\sigma_{\min}^2$ , we repeat the experiments of PDE-Refiner  
 721 on the KS equation while varying  $\sigma_{\min}^2$ . The results in Figure 23 show that PDE-Refiner is robust to  
 722 small changes of  $\sigma_{\min}^2$  and there exist a larger band of values where it performs equally well. When  
 723 increasing the variance further, the performance starts to decrease since the noise is too high to model  
 724 the lowest amplitude information. Note that the results on Figure 23 show the performance on the  
 725 test set, while the hyperparameter selection, in which we selected  $\sigma_{\min}^2 = 2e-7$ , was done on the  
 726 validation set.

727 In combination with the hyperparameter of the number of refinement steps, to which PDE-Refiner  
 728 showed to also be robust if more than 3 steps is chosen, PDE-Refiner is not very sensitive to the  
 729 newly introduced hyperparameters and values in a larger range can be considered.

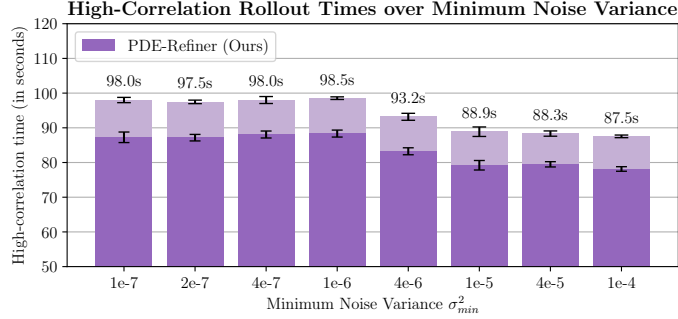

Figure 23: Plotting performance of PDE-Refiner over different values of the minimum noise variance  $\sigma_{min}^2$ . Each PDE-Refiner is robust to small changes of  $\sigma_{min}^2$ , showing an equal performance in the range of  $[10^{-7}, 10^{-6}]$ . Higher standard deviations start to decrease the performance, confirming our analysis of later refinement steps focusing on low-amplitude information. For the experiments in Section 4.1, we have selected  $\sigma_{min}^2 = 2e-7$  based on the validation dataset.

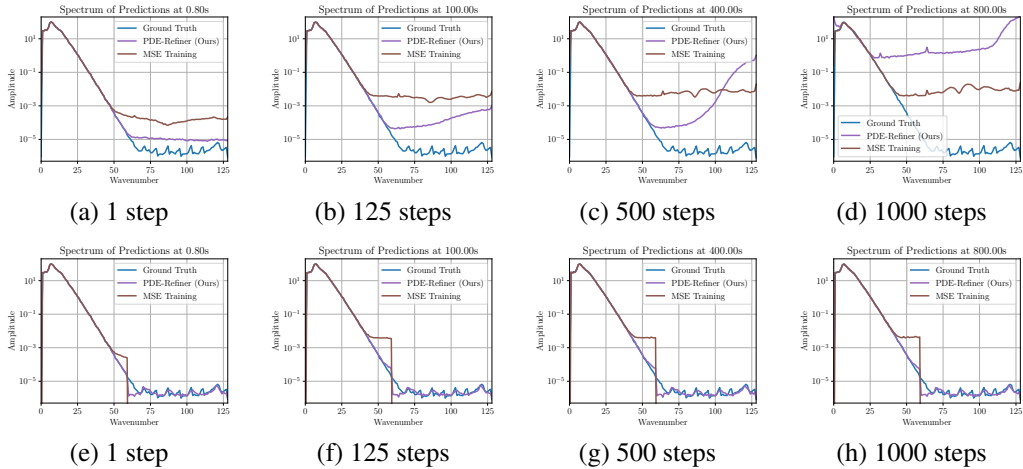

Figure 24: Evaluating PDE solver stability over very long rollouts (800 seconds, corresponding to 1000 autoregressive prediction steps). (a-d) The frequency spectrum of predictions of an MSE-trained model and PDE-Refiner. Over time, the MSE baseline’s overestimation of the high frequencies accumulates. In comparison, PDE-Refiner shows to have an increase of extremely high frequencies, which is likely caused by the continuous adding of Gaussian noise. (e-h) When we apply the error correction [56] on our models by setting all frequencies above 60 to zero, PDE-Refiner remains stable even for 1000 steps and does not diverge from the ground truth frequency spectrum.

## 730 E.7 Stability of Very Long Rollouts

731 Besides accurate rollouts, another important aspect of neural PDE solvers is their stability. This refers to the solvers staying in the solution domain and not generating physically unrealistic results. To  
 732 evaluate whether our solvers remain stable for a long time, we roll out an MSE-trained baseline and  
 733 PDE-Refiner for 1000 autoregressive prediction steps, which corresponds to 800 seconds simulation  
 734 time. We then perform a frequency analysis and plot the spectra in Figure 24. We compare the  
 735 spectra to the ground truth initial condition, to have a reference point of common frequency spectra  
 736 of solutions on the KS equation.  
 737

738 For the MSE-trained baseline, we find that the high frequencies, that are generally overestimated by  
 739 the model, accumulate over time. Still, the model maintains a frequency spectrum close to the ground  
 740 truth for wavenumbers below 40. PDE-Refiner maintains an accurate frequency spectrum for more  
 741 than 500 steps, but suffers from overestimating the very high frequencies in very long rollouts. This is  
 742 likely due to the iterative adding of Gaussian noise, that accumulates high-frequency errors. Further,  
 743 the U-Net has a limited receptive field such that the model cannot estimate the highest frequencies

744 properly. With larger architectures, this may be preventable.

745 However, a simpler alternative is to correct the predictions for known invariances, as done in McGreivy  
746 et al. [56]. We use the same setup as for Figure 3 by setting the highest frequencies to zero. This  
747 stabilizes PDE-Refiner, maintaining a very accurate estimation of the frequency spectrum even at  
748 800 seconds. The MSE-trained model yet suffers from an overestimation of the high-frequencies.

749 In summary, the models we consider here are stable for much longer than they remain accurate to the  
750 ground truth. Further, with a simple error correction, PDE-Refiner can keep up stable predictions for  
751 more than 1000 autoregressive rollout steps.

## 752 References

- 753 [1] Troy Arcomano, Istvan Szunyogh, Alexander Wikner, Jaideep Pathak, Brian R Hunt, and  
754 Edward Ott. 2022. A Hybrid Approach to Atmospheric Modeling That Combines Machine  
755 Learning With a Physics-Based Numerical Model. *Journal of Advances in Modeling Earth*  
756 *Systems*, 14(3):e2021MS002712.
- 757 [2] Yohai Bar-Sinai, Stephan Hoyer, Jason Hickey, and Michael P Brenner. 2019. Learning data-  
758 driven discretizations for partial differential equations. *Proceedings of the National Academy of*  
759 *Sciences*, 116(31):15344–15349.
- 760 [3] David Berthelot, Arnaud Autef, Jierui Lin, Dian Ang Yap, Shuangfei Zhai, Siyuan Hu, Daniel  
761 Zheng, Walter Talbot, and Eric Gu. 2023. TRACT: Denoising Diffusion Models with Transitive  
762 Closure Time-Distillation. *arXiv preprint arXiv:2303.04248*.
- 763 [4] Saakaar Bhatnagar, Yaser Afshar, Shaowu Pan, Karthik Duraisamy, and Shailendra Kaushik.  
764 2019. Prediction of aerodynamic flow fields using convolutional neural networks. *Computational*  
765 *Mechanics*, 64(2):525–545.
- 766 [5] Neill E. Bowler. 2006. Comparison of error breeding, singular vectors, random perturbations  
767 and ensemble Kalman filter perturbation strategies on a simple model. *Tellus A: Dynamic*  
768 *Meteorology and Oceanography*, 58(5):538–548.
- 769 [6] James Bradbury, Roy Frostig, Peter Hawkins, Matthew James Johnson, Chris Leary, Dougal  
770 Maclaurin, George Necula, Adam Paszke, Jake VanderPlas, Skye Wanderman-Milne, and Qiao  
771 Zhang. JAX: composable transformations of Python+NumPy programs. 2018. Software URL:  
772 <http://github.com/google/jax>.
- 773 [7] Johannes Brandstetter, Rianne van den Berg, Max Welling, and Jayesh K Gupta. 2023. Clifford  
774 Neural Layers for PDE Modeling. In *The Eleventh International Conference on Learning*  
775 *Representations*.
- 776 [8] Johannes Brandstetter, Max Welling, and Daniel E Worrall. 2022. Lie Point Symmetry Data  
777 Augmentation for Neural PDE Solvers. In *Proceedings of the 39th International Conference on*  
778 *Machine Learning*, volume 162 of *Proceedings of Machine Learning Research*, pages 2241–  
779 2256. PMLR.
- 780 [9] Johannes Brandstetter, Daniel E. Worrall, and Max Welling. 2022. Message Passing Neural  
781 PDE Solvers. In *International Conference on Learning Representations*.
- 782 [10] Steven L Brunton and J Nathan Kutz. 2023. Machine Learning for Partial Differential Equations.  
783 *arXiv preprint arXiv:2303.17078*.
- 784 [11] Ashesh Chattopadhyay and Pedram Hassanzadeh. 2023. Long-term instabilities of deep  
785 learning-based digital twins of the climate system: The cause and a solution. *arXiv preprint*  
786 *arXiv:2304.07029*.
- 787 [12] Prafulla Dhariwal and Alexander Nichol. 2021. Diffusion models beat gans on image synthesis.  
788 *Advances in Neural Information Processing Systems*, 34:8780–8794.
- 789 [13] Alexey Dosovitskiy, Lucas Beyer, Alexander Kolesnikov, Dirk Weissenborn, Xiaohua Zhai,  
790 Thomas Unterthiner, Mostafa Dehghani, Matthias Minderer, Georg Heigold, Sylvain Gelly,  
791 Jakob Uszkoreit, and Neil Houlsby. 2021. An Image is Worth 16x16 Words: Transformers for  
792 Image Recognition at Scale. In *International Conference on Learning Representations*.
- 793 [14] William Falcon and The PyTorch Lightning team. PyTorch Lightning. 2019. Software URL:  
794 <https://github.com/Lightning-AI/lightning>.
- 795 [15] Ian Goodfellow, Jean Pouget-Abadie, Mehdi Mirza, Bing Xu, David Warde-Farley, Sherjil  
796 Ozair, Aaron Courville, and Yoshua Bengio. 2014. Generative Adversarial Nets. In *Advances*  
797 *in Neural Information Processing Systems*, volume 27. Curran Associates, Inc.
- 798 [16] Jonathan Gordon, Wessel P Bruinsma, Andrew YK Foong, James Requeima, Yann Dubois,  
799 and Richard E Turner. 2019. Convolutional conditional neural processes. In *International*  
800 *Conference on Learning Representations*.
- 801 [17] Daniel Greenfeld, Meirav Galun, Ronen Basri, Irad Yavneh, and Ron Kimmel. 2019. Learning  
802 to Optimize Multigrid PDE Solvers. In *International Conference on Machine Learning (ICML)*,  
803 pages 2415–2423.

- 804 [18] Albert Gu, Tri Dao, Stefano Ermon, Atri Rudra, and Christopher Ré. 2020. Hippo: Recurrent  
805 memory with optimal polynomial projections. *Advances in neural information processing*  
806 *systems*, 33:1474–1487.
- 807 [19] Albert Gu, Karan Goel, and Christopher Re. 2022. Efficiently Modeling Long Sequences with  
808 Structured State Spaces. In *International Conference on Learning Representations*.
- 809 [20] Xiaoxiao Guo, Wei Li, and Francesco Iorio. 2016. Convolutional neural networks for steady  
810 flow approximation. In *Proceedings of the 22nd ACM SIGKDD International Conference on*  
811 *Knowledge Discovery and Data Mining*, pages 481–490.
- 812 [21] Jayesh K Gupta and Johannes Brandstetter. 2022. Towards Multi-spatiotemporal-scale General-  
813 ized PDE Modeling. *arXiv preprint arXiv:2209.15616*.
- 814 [22] Ernst Hairer and Gerhard Wanner. 1996. Solving ordinary differential equations. II, volume 14  
815 of Springer Series in Computational Mathematics.
- 816 [23] Jiequn Han, Arnulf Jentzen, and Weinan E. 2018. Solving high-dimensional partial differential  
817 equations using deep learning. *Proceedings of the National Academy of Sciences*, 115(34):8505–  
818 8510.
- 819 [24] Kaiming He, Xiangyu Zhang, Shaoqing Ren, and Jian Sun. 2016. Deep residual learning for  
820 image recognition. In *Proceedings of the IEEE conference on computer vision and pattern*  
821 *recognition*, pages 770–778.
- 822 [25] Kaiming He, Xiangyu Zhang, Shaoqing Ren, and Jian Sun. 2016. Identity Mappings in Deep  
823 Residual Networks. In *Computer Vision – ECCV 2016*, pages 630–645, Cham. Springer  
824 International Publishing.
- 825 [26] Dan Hendrycks and Kevin Gimpel. 2016. Gaussian error linear units (gelus). *arXiv preprint*  
826 *arXiv:1606.08415*.
- 827 [27] Philipp Hennig, Michael A Osborne, and Hans P Kersting. 2022. *Probabilistic Numerics:*  
828 *Computation as Machine Learning*. Cambridge University Press.
- 829 [28] Jonathan Ho, William Chan, Chitwan Saharia, Jay Whang, Ruiqi Gao, Alexey Gritsenko,  
830 Diederik P Kingma, Ben Poole, Mohammad Norouzi, David J Fleet, et al. 2022. Imagen video:  
831 High definition video generation with diffusion models. *arXiv preprint arXiv:2210.02303*.
- 832 [29] Jonathan Ho, Ajay Jain, and Pieter Abbeel. 2020. Denoising Diffusion Probabilistic Models.  
833 In *Advances in Neural Information Processing Systems*, volume 33, pages 6840–6851. Curran  
834 Associates, Inc.
- 835 [30] Jonathan Ho, Chitwan Saharia, William Chan, David J Fleet, Mohammad Norouzi, and Tim  
836 Salimans. 2022. Cascaded Diffusion Models for High Fidelity Image Generation. *J. Mach.*  
837 *Learn. Res.*, 23(47):1–33.
- 838 [31] Emiel Hooeboom and Tim Salimans. 2023. Blurring Diffusion Models. In *The Eleventh*  
839 *International Conference on Learning Representations*.
- 840 [32] Jun-Ting Hsieh, Shengjia Zhao, Stephan Eismann, Lucia Mirabella, and Stefano Ermon. 2019.  
841 Learning Neural PDE Solvers with Convergence Guarantees. *arXiv preprint arXiv:1906.01200*.
- 842 [33] J. D. Hunter. 2007. Matplotlib: A 2D graphics environment. *Computing in Science & Engineer-*  
843 *ing*, 9(3):90–95. Software URL: <https://github.com/matplotlib/matplotlib>.
- 844 [34] James M. Hyman and Basil Nicolaenko. 1986. The Kuramoto-Sivashinsky equation: A bridge  
845 between PDE’S and dynamical systems. *Physica D: Nonlinear Phenomena*, 18(1):113–126.
- 846 [35] Arieh Iserles. 2009. *A first course in the numerical analysis of differential equations*. 44.  
847 Cambridge university press.
- 848 [36] George Em Karniadakis, Ioannis G Kevrekidis, Lu Lu, Paris Perdikaris, Sifan Wang, and Liu  
849 Yang. 2021. Physics-informed machine learning. *Nature Reviews Physics*, 3(6):422–440.
- 850 [37] Tero Karras, Miika Aittala, Timo Aila, and Samuli Laine. 2022. Elucidating the Design Space  
851 of Diffusion-Based Generative Models. In *Advances in Neural Information Processing Systems*.
- 852 [38] Ryan Keisler. 2022. Forecasting Global Weather with Graph Neural Networks. *arXiv preprint*  
853 *arXiv:2202.07575*.



- 854 [39] Ioannis G. Kevrekidis, Basil Nicolaenko, and James C. Scovel. 1990. Back in the Saddle Again:  
855 A Computer Assisted Study of the Kuramoto–Sivashinsky Equation. *SIAM Journal on Applied*  
856 *Mathematics*, 50(3):760–790.
- 857 [40] Diederik P. Kingma and Jimmy Ba. 2015. Adam: A Method for Stochastic Optimization. In  
858 *3rd International Conference on Learning Representations, ICLR 2015, San Diego, CA, USA,*  
859 *May 7-9, 2015, Conference Track Proceedings.*
- 860 [41] Diederik P. Kingma and Max Welling. 2014. Auto-Encoding Variational Bayes. In *2nd*  
861 *International Conference on Learning Representations, ICLR 2014, Banff, AB, Canada, April*  
862 *14-16, 2014, Conference Track Proceedings.*
- 863 [42] Dmitrii Kochkov, Jamie A Smith, Ayya Alieva, Qing Wang, Michael P Brenner, and Stephan  
864 Hoyer. 2021. Machine learning–accelerated computational fluid dynamics. *Proceedings of the*  
865 *National Academy of Sciences*, 118(21):e2101784118.
- 866 [43] Yoshiki Kuramoto. 1978. Diffusion-induced chaos in reaction systems. *Progress of Theoretical*  
867 *Physics Supplement*, 64:346–367.
- 868 [44] Balaji Lakshminarayanan, Alexander Pritzel, and Charles Blundell. 2017. Simple and Scalable  
869 Predictive Uncertainty Estimation Using Deep Ensembles. In *Proceedings of the 31st Interna-*  
870 *tional Conference on Neural Information Processing Systems, NIPS’17*, page 6405–6416, Red  
871 Hook, NY, USA. Curran Associates Inc.
- 872 [45] Remi Lam, Alvaro Sanchez-Gonzalez, Matthew Willson, Peter Wirsberger, Meire Fortu-  
873 nato, Alexander Pritzel, Suman Ravuri, Timo Ewalds, Ferran Alet, Zach Eaton-Rosen, et al.  
874 2022. GraphCast: Learning skillful medium-range global weather forecasting. *arXiv preprint*  
875 *arXiv:2212.12794*.
- 876 [46] Sangyun Lee, Hyungjin Chung, Jaehyeon Kim, and Jong Chul Ye. 2022. Progressive deblurring  
877 of diffusion models for coarse-to-fine image synthesis. *arXiv preprint arXiv:2207.11192*.
- 878 [47] Zongyi Li, Nikola Kovachki, Kamyar Azizzadenesheli, Burigede Liu, Kaushik Bhattacharya,  
879 Andrew Stuart, and Anima Anandkumar. 2020. Neural operator: Graph kernel network for  
880 partial differential equations. *arXiv preprint arXiv:2003.03485*.
- 881 [48] Zongyi Li, Nikola Borislavov Kovachki, Kamyar Azizzadenesheli, Burigede liu, Kaushik Bhat-  
882 tacharya, Andrew Stuart, and Anima Anandkumar. 2021. Fourier Neural Operator for Paramet-  
883 ric Partial Differential Equations. In *International Conference on Learning Representations*.
- 884 [49] Zongyi Li, Miguel Liu-Schiaffini, Nikola Borislavov Kovachki, Kamyar Azizzadenesheli,  
885 Burigede Liu, Kaushik Bhattacharya, Andrew Stuart, and Anima Anandkumar. 2022. Learning  
886 Chaotic Dynamics in Dissipative Systems. In *Advances in Neural Information Processing*  
887 *Systems*.
- 888 [50] Ilya Loshchilov and Frank Hutter. 2019. Decoupled Weight Decay Regularization. In *Interna-*  
889 *tional Conference on Learning Representations*.
- 890 [51] Lu Lu, Pengzhan Jin, and George Em Karniadakis. 2019. DeepONet: Learning nonlinear  
891 operators for identifying differential equations based on the universal approximation theorem of  
892 operators. *arXiv preprint arXiv:1910.03193*.
- 893 [52] Lu Lu, Pengzhan Jin, Guofei Pang, Zhongqiang Zhang, and George Em Karniadakis. 2021.  
894 Learning nonlinear operators via DeepONet based on the universal approximation theorem of  
895 operators. *Nature Machine Intelligence*, 3(3):218–229.
- 896 [53] Lu Lu, Xuhui Meng, Shengze Cai, Zhiping Mao, Somdatta Goswami, Zhongqiang Zhang, and  
897 George Em Karniadakis. 2022. A comprehensive and fair comparison of two neural operators  
898 (with practical extensions) based on fair data. *Computer Methods in Applied Mechanics and*  
899 *Engineering*, 393:114778.
- 900 [54] Hao Ma, Yuxuan Zhang, Nils Thuerey, Xiangyu Hu, and Oskar J Haidn. 2021. Physics-driven  
901 learning of the steady Navier-Stokes equations using deep convolutional neural networks. *arXiv*  
902 *preprint arXiv:2106.09301*.
- 903 [55] James M. McDonough. 2007. *Lectures in Computational Fluid Dynamics of Incompressible*  
904 *Flow: Mathematics, Algorithms and Implementations*. 4. Mechanical Engineering Textbook  
905 Gallery.
- 906 [56] Nick McGreivy and Ammar Hakim. 2023. Invariant preservation in machine learned PDE  
907 solvers via error correction. *arXiv preprint arXiv:2303.16110*.

- 908 [57] Jonas Mikhaeil, Zahra Monfared, and Daniel Durstewitz. 2022. On the difficulty of learning  
909 chaotic dynamics with RNNs. In *Advances in Neural Information Processing Systems*, vol-  
910 ume 35, pages 11297–11312. Curran Associates, Inc.
- 911 [58] Tung Nguyen, Johannes Brandstetter, Ashish Kapoor, Jayesh K Gupta, and Aditya Grover. 2023.  
912 *ClimaX: A foundation model for weather and climate. arXiv preprint arXiv:2301.10343.*
- 913 [59] Alexander Quinn Nichol and Prafulla Dhariwal. 2021. Improved denoising diffusion probabilis-  
914 tic models. In *International Conference on Machine Learning*, pages 8162–8171. PMLR.
- 915 [60] Adam Paszke, Sam Gross, Francisco Massa, Adam Lerer, James Bradbury, Gregory Chanan,  
916 Trevor Killeen, Zeming Lin, Natalia Gimelshein, Luca Antiga, Alban Desmaison, An-  
917 dreas Kopf, Edward Yang, Zachary DeVito, Martin Raison, Alykhan Tejani, Sasank Chil-  
918 amkurthy, Benoit Steiner, Lu Fang, Junjie Bai, and Soumith Chintala. 2019. PyTorch:  
919 An Imperative Style, High-Performance Deep Learning Library. In *Advances in Neu-  
920 ral Information Processing Systems*, volume 32. Curran Associates, Inc. Software URL:  
921 <https://github.com/pytorch/pytorch>.
- 922 [61] Jaideep Pathak, Shashank Subramanian, Peter Harrington, Sanjeev Raja, Ashesh Chattopadhyay,  
923 Morteza Mardani, Thorsten Kurth, David Hall, Zongyi Li, Kamyar Azizzadenesheli, Pedram  
924 Hassanzadeh, Karthik Kashinath, and Animashree Anandkumar. 2022. FourCastNet: A Global  
925 Data-driven High-resolution Weather Model using Adaptive Fourier Neural Operators. *arXiv  
926 preprint arXiv:2202.11214.*
- 927 [62] Ethan Perez, Florian Strub, Harm de Vries, Vincent Dumoulin, and Aaron Courville. 2018.  
928 FiLM: Visual Reasoning with a General Conditioning Layer. In *Proceedings of the Thirty-  
929 Second AAAI Conference on Artificial Intelligence and Thirtieth Innovative Applications of  
930 Artificial Intelligence Conference and Eighth AAAI Symposium on Educational Advances in  
931 Artificial Intelligence, AAAI’18/IAAI’18/EAAI’18*. AAAI Press.
- 932 [63] Patrick von Platen, Suraj Patil, Anton Lozhkov, Pedro Cuenca, Nathan Lambert, Kashif Rasul,  
933 Mishig Davaadorj, and Thomas Wolf. 2022. Diffusers: State-of-the-art diffusion models.  
934 Software URL: <https://github.com/huggingface/diffusers>.
- 935 [64] Maziar Raissi, Paris Perdikaris, and George E Karniadakis. 2019. Physics-informed neural  
936 networks: A deep learning framework for solving forward and inverse problems involving  
937 nonlinear partial differential equations. *Journal of Computational physics*, 378:686–707.
- 938 [65] Stephan Rasp and Nils Thuerey. 2021. Data-driven medium-range weather prediction with a  
939 resnet pretrained on climate simulations: A new model for weatherbench. *Journal of Advances  
940 in Modeling Earth Systems*, 13(2):e2020MS002405.
- 941 [66] Chitwan Saharia, William Chan, Saurabh Saxena, Lala Li, Jay Whang, Emily L Denton,  
942 Kamyar Ghasemipour, Raphael Gontijo Lopes, Burcu Karagol Ayan, Tim Salimans, et al. 2022.  
943 Photorealistic text-to-image diffusion models with deep language understanding. *Advances in  
944 Neural Information Processing Systems*, 35:36479–36494.
- 945 [67] Tim Salimans and Jonathan Ho. 2022. Progressive Distillation for Fast Sampling of Diffusion  
946 Models. In *International Conference on Learning Representations*.
- 947 [68] Sebastian Scher and Gabriele Messori. 2021. Ensemble Methods for Neural Network-Based  
948 Weather Forecasts. *Journal of Advances in Modeling Earth Systems*, 13(2).
- 949 [69] Jacob H Seidman, Georgios Kissas, George J Pappas, and Paris Perdikaris. 2023. Variational  
950 Autoencoding Neural Operators. *arXiv preprint arXiv:2302.10351.*
- 951 [70] G.I. Sivashinsky. 1977. Nonlinear analysis of hydrodynamic instability in laminar flames—I.  
952 Derivation of basic equations. *Acta Astronautica*, 4(11):1177–1206.
- 953 [71] Yiorgos S. Smyrlis and Demetrios T. Papageorgiou. 1991. Predicting Chaos for Infinite Dimen-  
954 sional Dynamical Systems: The Kuramoto-Sivashinsky Equation, A Case Study. *Proceedings  
955 of the National Academy of Sciences of the United States of America*, 88(24):11129–11132.
- 956 [72] Jascha Sohl-Dickstein, Eric Weiss, Niru Maheswaranathan, and Surya Ganguli. 2015. Deep  
957 unsupervised learning using nonequilibrium thermodynamics. In *International Conference on  
958 Machine Learning*, pages 2256–2265. PMLR.
- 959 [73] Casper Kaae Sønderby, Lasse Espeholt, Jonathan Heek, Mostafa Dehghani, Avital Oliver, Tim  
960 Salimans, Shreya Agrawal, Jason Hickey, and Nal Kalchbrenner. 2020. Metnet: A neural  
961 weather model for precipitation forecasting. *arXiv preprint arXiv:2003.12140.*

- 962 [74] Yang Song, Jascha Sohl-Dickstein, Diederik P Kingma, Abhishek Kumar, Stefano Ermon, and  
963 Ben Poole. 2021. Score-Based Generative Modeling through Stochastic Differential Equations.  
964 In *International Conference on Learning Representations*.
- 965 [75] Zhiqing Sun, Yiming Yang, and Shinjae Yoo. 2023. A Neural PDE Solver with Temporal  
966 Stencil Modeling. *arXiv preprint arXiv:2302.08105*.
- 967 [76] Makoto Takamoto, Timothy Praditia, Raphael Leiteritz, Dan MacKinlay, Francesco Alesiani,  
968 Dirk Pflüger, and Mathias Niepert. 2022. PDEBench: An Extensive Benchmark for Scientific  
969 Machine Learning. In *36th Conference on Neural Information Processing Systems (NeurIPS  
970 2022) Track on Datasets and Benchmarks*.
- 971 [77] Nils Thuerey, Philipp Holl, Maximilian Mueller, Patrick Schnell, Felix Trost, and Kiwon Um.  
972 2021. Physics-based Deep Learning. *arXiv preprint arXiv:2109.05237*.
- 973 [78] Jakub M Tomczak. 2022. *Deep generative modeling*. Springer.
- 974 [79] Kiwon Um, Robert Brand, Yun (Raymond) Fei, Philipp Holl, and Nils Thuerey. 2020. Solver-  
975 in-the-Loop: Learning from Differentiable Physics to Interact with Iterative PDE-Solvers. In  
976 *Advances in Neural Information Processing Systems*, volume 33, pages 6111–6122. Curran  
977 Associates, Inc.
- 978 [80] Ashish Vaswani, Noam Shazeer, Niki Parmar, Jakob Uszkoreit, Llion Jones, Aidan N Gomez,  
979 Łukasz Kaiser, and Illia Polosukhin. 2017. Attention is All you Need. In *Advances in Neural  
980 Information Processing Systems*, volume 30. Curran Associates, Inc.
- 981 [81] Pauli Virtanen, Ralf Gommers, Travis E. Oliphant, Matt Haberland, Tyler Reddy, David  
982 Cournapeau, Evgeni Burovski, Pearu Peterson, Warren Weckesser, Jonathan Bright, Stéfan J.  
983 van der Walt, Matthew Brett, Joshua Wilson, K. Jarrod Millman, Nikolay Mayorov, An-  
984 drew R. J. Nelson, Eric Jones, Robert Kern, Eric Larson, C J Carey, İlhan Polat, Yu Feng,  
985 Eric W. Moore, Jake VanderPlas, Denis Laxalde, Josef Perktold, Robert Cimrman, Ian Hen-  
986 riksen, E. A. Quintero, Charles R. Harris, Anne M. Archibald, Antônio H. Ribeiro, Fabian  
987 Pedregosa, Paul van Mulbregt, and SciPy 1.0 Contributors. 2020. SciPy 1.0: Fundamental Al-  
988 gorithms for Scientific Computing in Python. *Nature Methods*, 17:261–272. Software URL:  
989 <https://github.com/scipy/scipy>.
- 990 [82] Sifan Wang and Paris Perdikaris. 2023. Long-time integration of parametric evolution equations  
991 with physics-informed deeponets. *Journal of Computational Physics*, 475:111855.
- 992 [83] Sifan Wang, Hanwen Wang, and Paris Perdikaris. 2021. Learning the solution operator of  
993 parametric partial differential equations with physics-informed DeepONets. *Science advances*,  
994 7(40):eabi8605.
- 995 [84] Daniel Watson, William Chan, Jonathan Ho, and Mohammad Norouzi. 2022. Learning Fast  
996 Samplers for Diffusion Models by Differentiating Through Sample Quality. In *International  
997 Conference on Learning Representations*.
- 998 [85] Jonathan A Weyn, Dale R Durran, and Rich Caruana. 2020. Improving data-driven global  
999 weather prediction using deep convolutional neural networks on a cubed sphere. *Journal of  
1000 Advances in Modeling Earth Systems*, 12(9):e2020MS002109.
- 1001 [86] Yuxin Wu and Kaiming He. 2018. Group Normalization. In *Proceedings of the European  
1002 Conference on Computer Vision (ECCV)*.
- 1003 [87] Yasin Yazıcı, Chuan-Sheng Foo, Stefan Winkler, Kim-Hui Yap, Georgios Piliouras, and Vijay  
1004 Chandrasekhar. 2019. The Unusual Effectiveness of Averaging in GAN Training. In *Interna-  
1005 tional Conference on Learning Representations*.
